# Supplementary material for: The mediating role of coping behavior on the age-technostress relationship: A longitudinal multilevel mediation model
Source: PubMed Central journal article supplement (PMC6400396; doi:10.1371/journal.pone.0213349), 2019-03-05
Supplement: pone.0213349.s001.pdf [file pone.0213349.s001.pdf]

**S1 Table. Correlation Matrix and Descriptive Statistics.**

|          | <i>M</i> | <i>SD</i> | $\alpha$ | age     | active |        |        | social |        |        | diseng |        |        | strain |        |        | tstr   |        |        | dep    |        |
|----------|----------|-----------|----------|---------|--------|--------|--------|--------|--------|--------|--------|--------|--------|--------|--------|--------|--------|--------|--------|--------|--------|
|          |          |           |          |         | t1     | t2     | t3     | t1     | t2     | t3     | t1     | t2     | t3     | t1     | t2     | t3     | t1     | t2     | t3     | t1     | t2     |
| age      | 46.29    | 10.65     |          |         |        |        |        |        |        |        |        |        |        |        |        |        |        |        |        |        |        |
| t1active | 2.72     | .78       | .87      | -.101** |        |        |        |        |        |        |        |        |        |        |        |        |        |        |        |        |        |
| t2active | 2.68     | .79       | .89      | -.018   | .548** |        |        |        |        |        |        |        |        |        |        |        |        |        |        |        |        |
| t3active | 2.67     | .80       | .88      | -.024   | .600** | .541** |        |        |        |        |        |        |        |        |        |        |        |        |        |        |        |
| t1social | 2.57     | .81       | .90      | -.131** | .755** | .488** | .478** |        |        |        |        |        |        |        |        |        |        |        |        |        |        |
| t2social | 2.53     | .80       | .89      | -.072*  | .481** | .767** | .456** | .597** |        |        |        |        |        |        |        |        |        |        |        |        |        |
| t3social | 2.48     | .82       | .90      | -.045   | .504** | .461** | .747** | .591** | .551** |        |        |        |        |        |        |        |        |        |        |        |        |
| t1diseng | 1.61     | .62       | .86      | -.101** | .074*  | .030   | -.014  | .215** | .161** | .100*  |        |        |        |        |        |        |        |        |        |        |        |
| t2diseng | 1.60     | .61       | .85      | -.143** | .049   | .107** | -.042  | .130** | .250** | .038   | .595** |        |        |        |        |        |        |        |        |        |        |
| t3diseng | 1.61     | .66       | .87      | -.138** | .022   | .025   | .113** | .115** | .148** | .220** | .556** | .550** |        |        |        |        |        |        |        |        |        |
| t1strain | 1.89     | 1.27      | .95      | -.083** | .143** | .131** | .126** | .213** | .213** | .179** | .519** | .490** | .425** |        |        |        |        |        |        |        |        |
| t2strain | 1.97     | 1.33      | .96      | -.143** | .120** | .147** | .126** | .184** | .236** | .197** | .457** | .558** | .469** | .723** |        |        |        |        |        |        |        |
| t3strain | 2.00     | 1.38      | .97      | -.125** | .130** | .098*  | .177** | .206** | .207** | .237** | .458** | .470** | .535** | .721** | .729** |        |        |        |        |        |        |
| t1tstr   | 13.69    | 4.71      | .94      | -.052   | .173** | .169** | .160** | .254** | .273** | .208** | .555** | .481** | .455** | .650** | .591** | .597** |        |        |        |        |        |
| t2tstr   | 13.96    | 4.86      | .94      | -.103** | .179** | .211** | .116** | .249** | .283** | .204** | .485** | .535** | .461** | .588** | .676** | .588** | .767** |        |        |        |        |
| t3tstr   | 14.01    | 4.99      | .95      | -.063   | .125** | .153** | .197** | .199** | .229** | .271** | .471** | .489** | .545** | .554** | .572** | .634** | .745** | .759** |        |        |        |
| t1dep    | 3.68     | 1.05      | .90      | -.094** | .438** | .382** | .398** | .372** | .323** | .340** | .108** | .077*  | .096*  | .219** | .195** | .225** | .339** | .315** | .308** |        |        |
| t2dep    | 3.69     | 1.10      | .92      | -.090** | .402** | .436** | .357** | .345** | .365** | .314** | .076*  | .060   | .063   | .175** | .185** | .215** | .264** | .335** | .274** | .852** |        |
| t3dep    | 3.65     | 1.10      | .92      | -.081*  | .416** | .393** | .412** | .376** | .343** | .382** | .069   | .064   | .068   | .173** | .190** | .218** | .252** | .279** | .339** | .825** | .841** |

*Note.* Sample size =  $N_{t1} = 1,215$ ,  $N_{t2} = 840$ ,  $N_{t3} = 631$ , active = active coping, social = social instrumental support, diseng = behavioral disengagement, strain = technology-related strain, tstr = techno-stressors, dep = IT dependency, t1-t3 = measurement point 1-3, \*\*Correlation is significant at the .01 level (2-tailed), \*Correlation is significant at the .05 level (2-tailed).
