# Supplementary material for: The mediating role of coping behavior on the age-technostress relationship: A longitudinal multilevel mediation model
Source: PubMed Central journal article supplement (PMC6400396; doi:10.1371/journal.pone.0213349), 2019-03-05
Supplement: pone.0213349.s002.pdf [file pone.0213349.s002.pdf]

**S2 Table. Results from MLM with techno-stressors and active coping as mediators.**

| <b>Within Level</b>                       |          |      |          |       |       |                       |          |
|-------------------------------------------|----------|------|----------|-------|-------|-----------------------|----------|
| <b>Outcome: active coping</b>             |          |      |          |       |       |                       |          |
|                                           | Estimate | SE   | <i>p</i> | LL    | UL    | <i>R</i> <sup>2</sup> | <i>p</i> |
| tstr                                      | .098     | .031 | .001     | .048  | .149  | .024                  | .010     |
| dep                                       | .095     | .030 | .002     | .045  | .145  |                       |          |
| <b>Outcome: technology-related strain</b> |          |      |          |       |       |                       |          |
|                                           | Estimate | SE   | <i>p</i> | LL    | UL    | <i>R</i> <sup>2</sup> | <i>p</i> |
| tstr                                      | .292     | .034 | .000     | .237  | .347  | .092                  | .000     |
| active                                    | .076     | .026 | .004     | .033  | .119  |                       |          |
| dep                                       | -.026    | .035 | .452     | -.083 | .031  |                       |          |
| <b>Between Level</b>                      |          |      |          |       |       |                       |          |
| <b>Outcome: techno-stressors</b>          |          |      |          |       |       |                       |          |
|                                           | Estimate | SE   | <i>p</i> | LL    | UL    | <i>R</i> <sup>2</sup> | <i>p</i> |
| age                                       | -.037    | .031 | .224     | -.088 | .013  | .125                  | .000     |
| dep                                       | .348     | .029 | .000     | .300  | .396  |                       |          |
| <b>Outcome: active coping</b>             |          |      |          |       |       |                       |          |
|                                           | Estimate | SE   | <i>p</i> | LL    | UL    | <i>R</i> <sup>2</sup> | <i>p</i> |
| age                                       | -.030    | .029 | .286     | -.077 | .017  | .339                  | .000     |
| tstr                                      | .020     | .036 | .568     | -.038 | .079  |                       |          |
| dep                                       | .571     | .035 | .000     | .514  | .628  |                       |          |
| <b>Outcome: technology-related strain</b> |          |      |          |       |       |                       |          |
|                                           | Estimate | SE   | <i>p</i> | LL    | UL    | <i>R</i> <sup>2</sup> | <i>p</i> |
| age                                       | -.068    | .024 | .004     | -.106 | -.029 | .618                  | .000     |
| tstr                                      | .790     | .021 | .000     | .756  | .824  |                       |          |
| active                                    | .012     | .036 | .742     | -.048 | .072  |                       |          |
| dep                                       | -.043    | .033 | .200     | -.097 | .012  |                       |          |
| <b>Total, Direct and Indirect Effects</b> |          |      |          |       |       |                       |          |
| <b>age to strain</b>                      |          |      |          |       |       |                       |          |
|                                           | Estimate | SE   | <i>p</i> | LL    | UL    |                       |          |
| total                                     | -.122    | .033 | .000     | -.176 | -.068 |                       |          |
| total indirect                            | -.054    | .025 | .029     | -.095 | -.013 |                       |          |
| via tstr                                  | -.029    | .024 | .224     | -.069 | .010  |                       |          |
| via active                                | .000     | .001 | .753     | -.002 | .002  |                       |          |
| via tstr and active                       | .000     | .000 | .748     | .000  | .000  |                       |          |
| direct effect                             | -.068    | .024 | .004     | -.106 | -.029 |                       |          |

*Note.* Model was fit using Mplus 7.1. *N* = 1,216, SE = standard error, *p* = two-tailed *p*-value, LL/ UL = 95% lower-level and upper-level confidence interval, active = active coping, tstr = techno-stressors
