# Supplementary material for: The mediating role of coping behavior on the age-technostress relationship: A longitudinal multilevel mediation model
Source: PubMed Central journal article supplement (PMC6400396; doi:10.1371/journal.pone.0213349), 2019-03-05
Supplement: pone.0213349.s003.pdf [file pone.0213349.s003.pdf]

**S3 Table. Results from MLM with techno-stressors and social coping as mediators.**

| <b>Within Level</b>                       |          |      |          |       |       |                       |          |
|-------------------------------------------|----------|------|----------|-------|-------|-----------------------|----------|
| <b>Outcome: social coping</b>             |          |      |          |       |       |                       |          |
|                                           | Estimate | SE   | <i>p</i> | LL    | UL    | <i>R</i> <sup>2</sup> | <i>p</i> |
| tstr                                      | .116     | .032 | .000     | .064  | .168  | .021                  | .016     |
| dep                                       | .061     | .028 | .029     | .015  | .107  |                       |          |
| <b>Outcome: technology-related strain</b> |          |      |          |       |       |                       |          |
|                                           | Estimate | SE   | <i>p</i> | LL    | UL    | <i>R</i> <sup>2</sup> | <i>p</i> |
| tstr                                      | .290     | .034 | .000     | .235  | .290  | .093                  | .000     |
| social                                    | .081     | .027 | .002     | .037  | .124  |                       |          |
| dep                                       | -.024    | .035 | .488     | -.081 | .033  |                       |          |
| <b>Between Level</b>                      |          |      |          |       |       |                       |          |
| <b>Outcome: techno-stressors</b>          |          |      |          |       |       |                       |          |
|                                           | Estimate | SE   | <i>p</i> | LL    | UL    | <i>R</i> <sup>2</sup> | <i>p</i> |
| age                                       | -.038    | .031 | .221     | -.088 | .013  | .125                  | .000     |
| dep                                       | .348     | .029 | .000     | .300  | .397  |                       |          |
| <b>Outcome: social coping</b>             |          |      |          |       |       |                       |          |
|                                           | Estimate | SE   | <i>p</i> | LL    | UL    | <i>R</i> <sup>2</sup> | <i>p</i> |
| age                                       | -.087    | .030 | .003     | -.137 | -.038 | .284                  | .000     |
| tstr                                      | .168     | .035 | .000     | .110  | .225  |                       |          |
| dep                                       | .433     | .035 | .000     | .376  | .490  |                       |          |
| <b>Outcome: technology-related strain</b> |          |      |          |       |       |                       |          |
|                                           | Estimate | SE   | <i>p</i> | LL    | UL    | <i>R</i> <sup>2</sup> | <i>p</i> |
| age                                       | -.065    | .024 | .006     | -.104 | -.026 | .618                  | .000     |
| tstr                                      | .785     | .021 | .000     | .750  | .820  |                       |          |
| social                                    | .030     | .033 | .372     | -.025 | .084  |                       |          |
| dep                                       | -.049    | .029 | .097     | -.097 | .000  |                       |          |
| <b>Total, Direct and Indirect Effects</b> |          |      |          |       |       |                       |          |
| <b>age to strain</b>                      |          |      |          |       |       |                       |          |
|                                           | Estimate | SE   | <i>p</i> | LL    | UL    |                       |          |
| total                                     | -.122    | .033 | .000     | -.176 | -.068 |                       |          |
| total indirect                            | -.057    | .025 | .022     | -.097 | .016  |                       |          |
| via tstr                                  | -.029    | .024 | .222     | -.069 | .010  |                       |          |
| via social                                | -.003    | .003 | .394     | -.008 | .002  |                       |          |
| via tstr and social                       | .000     | .000 | .447     | -.001 | .000  |                       |          |
| direct                                    | -.065    | .024 | .006     | -.104 | -.026 |                       |          |

*Note.* Model was fit using Mplus 7.1. *N* = 1,216, SE = standard error, *p* = two-tailed *p*-value, LL/ UL = 95% lower-level and upper-level confidence interval, social = social instrumental support, tstr = techno-stressors
