# Supplementary material for: The mediating role of coping behavior on the age-technostress relationship: A longitudinal multilevel mediation model
Source: PubMed Central journal article supplement (PMC6400396; doi:10.1371/journal.pone.0213349), 2019-03-05
Supplement: pone.0213349.s004.pdf [file pone.0213349.s004.pdf]

**S4 Table. Results from MLM with techno-stressors and behavioral disengagement as mediators.**

| <b>Within Level</b>                       |          |      |          |       |       |                       |          |
|-------------------------------------------|----------|------|----------|-------|-------|-----------------------|----------|
| <b>Outcome: behavioral disengagement</b>  |          |      |          |       |       |                       |          |
|                                           | Estimate | SE   | <i>p</i> | LL    | UL    | <i>R</i> <sup>2</sup> | <i>p</i> |
| tstr                                      | .225     | .035 | .000     | .167  | .282  | .047                  | .001     |
| dep                                       | -.053    | .030 | .072     | -.102 | -.005 |                       |          |
| <b>Outcome: technology-related strain</b> |          |      |          |       |       |                       |          |
|                                           | Estimate | SE   | <i>p</i> | LL    | UL    | <i>R</i> <sup>2</sup> | <i>p</i> |
| tstr                                      | .266     | .032 | .000     | .213  | .319  | .107                  | .000     |
| diseng                                    | .147     | .032 | .000     | .094  | .200  |                       |          |
| dep                                       | -.012    | .034 | .717     | -.067 | .043  |                       |          |
| <b>Between Level</b>                      |          |      |          |       |       |                       |          |
| <b>Outcome: techno-stressors</b>          |          |      |          |       |       |                       |          |
|                                           | Estimate | SE   | <i>p</i> | LL    | UL    | <i>R</i> <sup>2</sup> | <i>p</i> |
| age                                       | -.037    | .031 | .226     | -.087 | .013  | .126                  | .000     |
| dep                                       | .349     | .029 | .000     | .301  | .398  |                       |          |
| <b>Outcome: behavioral disengagement</b>  |          |      |          |       |       |                       |          |
|                                           | Estimate | SE   | <i>p</i> | LL    | UL    | <i>R</i> <sup>2</sup> | <i>p</i> |
| age                                       | -.114    | .026 | .000     | -.067 | .007  | .569                  | .000     |
| tstr                                      | .782     | .025 | .000     | .741  | .823  |                       |          |
| dep                                       | -.168    | .030 | .000     | -.217 | -.119 |                       |          |
| <b>Outcome: technology-related strain</b> |          |      |          |       |       |                       |          |
|                                           | Estimate | SE   | <i>p</i> | LL    | UL    | <i>R</i> <sup>2</sup> | <i>p</i> |
| age                                       | -.030    | .022 | .175     | -.067 | .007  | .665                  | .000     |
| tstr                                      | .531     | .050 | .000     | .449  | .613  |                       |          |
| diseng                                    | .331     | .055 | .000     | .241  | .421  |                       |          |
| dep                                       | .021     | .024 | .380     | -.018 | .021  |                       |          |
| <b>Total, Direct and Indirect Effects</b> |          |      |          |       |       |                       |          |
| <b>age to strain</b>                      |          |      |          |       |       |                       |          |
|                                           | Estimate | SE   | <i>p</i> | LL    | UL    |                       |          |
| total                                     | -.122    | .033 | .000     | -.176 | -.068 |                       |          |
| total indirect                            | -.091    | .027 | .001     | -.136 | -.046 |                       |          |
| via tstr                                  | -.020    | .016 | .226     | -.046 | .007  |                       |          |
| via diseng                                | -.038    | .011 | .000     | -.055 | -.020 |                       |          |
| via tstr and diseng                       | -.010    | .008 | .245     | -.023 | .004  |                       |          |
| direct                                    | -.030    | .022 | .175     | -.067 | .007  |                       |          |

*Note.* Model was fit using Mplus 7.1. *N* = 1,216, SE = standard error, *p* = two-tailed *p*-value, LL/ UL = 95% lower-level and upper-level confidence interval, diseng = behavioral disengagement, tstr = techno-stressors
