# Supplementary material for: The mediating role of coping behavior on the age-technostress relationship: A longitudinal multilevel mediation model
Source: PubMed Central journal article supplement (PMC6400396; doi:10.1371/journal.pone.0213349), 2019-03-05
Supplement: pone.0213349.s005.pdf [file pone.0213349.s005.pdf]

**S5 Table. Spiral Effects: results from two serial mediation models.**

| <b>Model 1 (age → t<sub>1</sub> strain → t<sub>2</sub> diseng → t<sub>3</sub> strain)</b> |                             |                             |                             |
|-------------------------------------------------------------------------------------------|-----------------------------|-----------------------------|-----------------------------|
|                                                                                           | <b>t<sub>1</sub> strain</b> | <b>t<sub>2</sub> diseng</b> | <b>t<sub>3</sub> strain</b> |
|                                                                                           | $R^2 = .05^{***}$           | $R^2 = .25^{***}$           | $R^2 = .54^{***}$           |
|                                                                                           | $\beta$ [95 % CI]           | $\beta$ [95 % CI]           | $\beta$ [95 % CI]           |
| age                                                                                       | -.01 [-.02; .00]            | -.01 [-.01; .00]            | -.01 [-.02; .00]            |
| t <sub>1</sub> dep (control)                                                              | .26 [.16; .35]              | -.01 [-.06; .03]            | .10 [-.02; .00]             |
| t <sub>1</sub> strain (M1)                                                                |                             | .22 [.19; .25]              | .65 [.03; .17]              |
| t <sub>2</sub> diseng (M2)                                                                |                             |                             | .34 [.19; .48]              |
| <b>direct effect</b>                                                                      |                             |                             |                             |
| age → strain t <sub>3</sub>                                                               |                             |                             | -.01 [-.01; -.00]           |
| <b>indirect effects</b>                                                                   |                             |                             |                             |
| age → t <sub>1</sub> strain → t <sub>3</sub> strain                                       |                             |                             | -.01 [-.01; .00]            |
| age → t <sub>1</sub> strain → t <sub>2</sub> diseng → t <sub>3</sub> strain               |                             |                             | -.00 [-.00; .00]            |
| age → t <sub>2</sub> diseng → t <sub>3</sub> strain                                       |                             |                             | -.00 [-.01; .00]            |
| <b>Model 2 (age → t<sub>1</sub> diseng → t<sub>2</sub> strain → t<sub>3</sub> diseng)</b> |                             |                             |                             |
|                                                                                           | <b>t<sub>1</sub> diseng</b> | <b>t<sub>2</sub> strain</b> | <b>t<sub>3</sub> diseng</b> |
|                                                                                           | $R^2 = .02^{***}$           | $R^2 = .22^{***}$           | $R^2 = .37^{***}$           |
|                                                                                           | $\beta$ [95 % CI]           | $\beta$ [95 % CI]           | $\beta$ [95 % CI]           |
| age                                                                                       | -.01 [-.01; -.00]           | -.01 [-.02; -.00]           | -.00 [-.01; .00]            |
| t <sub>1</sub> dep (control)                                                              | .06 [.01; .11]              | .23 [.14; .32]              | -.01 [-.05; .03]            |
| t <sub>1</sub> diseng (M1)                                                                |                             | .82 [.67; .96]              | .43 [.36; .50]              |
| t <sub>2</sub> strain (M2)                                                                |                             |                             | .13 [.10; .17]              |
| <b>direct effect</b>                                                                      |                             |                             |                             |
| age → diseng t <sub>3</sub>                                                               |                             |                             | -.00 [-.01; -.00]           |
| <b>indirect effects</b>                                                                   |                             |                             |                             |
| age → t <sub>1</sub> disng → t <sub>3</sub> diseng                                        |                             |                             | -.00 [-.01; -.00]           |
| age → t <sub>1</sub> diseng → t <sub>2</sub> strain → t <sub>3</sub> diseng               |                             |                             | -.00 [-.00; -.00]           |
| age → t <sub>2</sub> strain → t <sub>3</sub> diseng                                       |                             |                             | -.00 [-.00; -.00]           |

*Note.* SE = standard error, \* =  $p$ -value < .05, \*\* =  $p$ -value < .01, \*\*\* =  $p$ -value < .001, dep = IT-dependency, diseng = behavioral disengagement, strain = technology-related strain, CI = 95% confidence intervals based on bias corrected bootstrap analyses with 1,000 repetitions
